# Supplementary material for: Bifunctional gas sensor based on Bi2S3/SnS2 heterostructures with improved selectivity through visible light modulation
Source: Royal Society of Chemistry journal article supplement (doi:10.1039/d1ta10461f), 2022-01-01
Supplement: d1ta10461f1.pdf [file d1ta10461f1.pdf]

## Supplementary Information

### **Bifunctional gas sensor based on Bi<sub>2</sub>S<sub>3</sub>/SnS<sub>2</sub> heterostructures with improved selectivity through visible light modulation**

Tingting Wang,<sup>a,b</sup> Juanyuan Hao,<sup>\*b</sup> Jiaying Liu,<sup>b</sup> Yanling Zhang,<sup>b</sup> Qihua Liang,<sup>c</sup> Ruozhen Wu,<sup>a</sup> Hsu-Sheng Tsai,<sup>d,e</sup> and You Wang<sup>\*a,b</sup>

a. School of Materials Science and Engineering, Harbin Institute of Technology, Harbin 150001, China.

b. School of Chemistry and Chemical Engineering, Harbin Institute of Technology, Harbin 150001, China.

c. State Key Laboratory of Inorganic Synthesis and Preparative Chemistry, College of Chemistry, Jilin University, Changchun 130012, China

d. Laboratory for Space Environment and Physical Sciences, Harbin Institute of Technology, Harbin 150001, China.

e. School of Physics, Harbin Institute of Technology, Harbin 150001, China.

E-mail: jyhao@hit.edu.cn; y-wang@hit.edu.cn

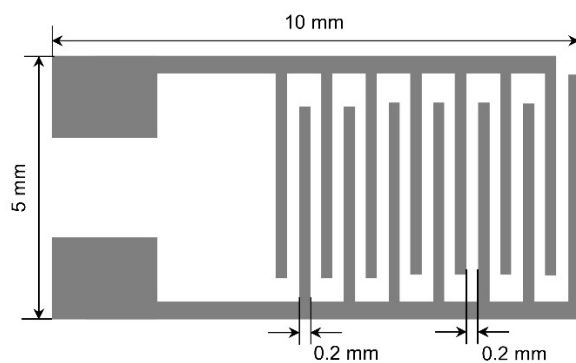

**Fig. S1** Schematic diagram of the Au interdigital electrode.

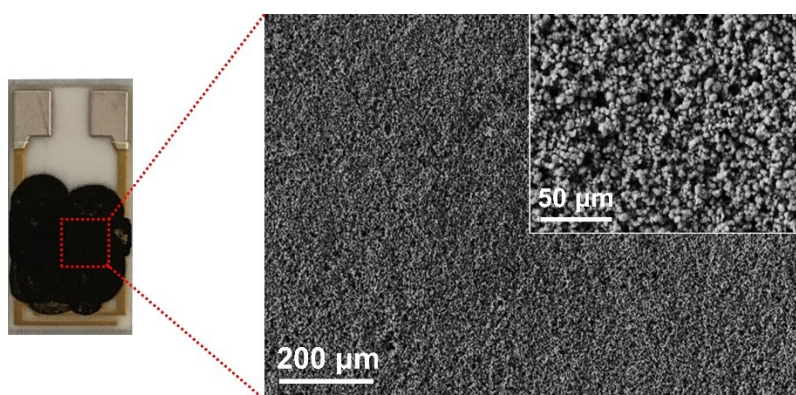

**Fig. S2** SEM images of  $\text{Bi}_2\text{S}_3/\text{SnS}_2$  dispersed on the interdigitated electrode.

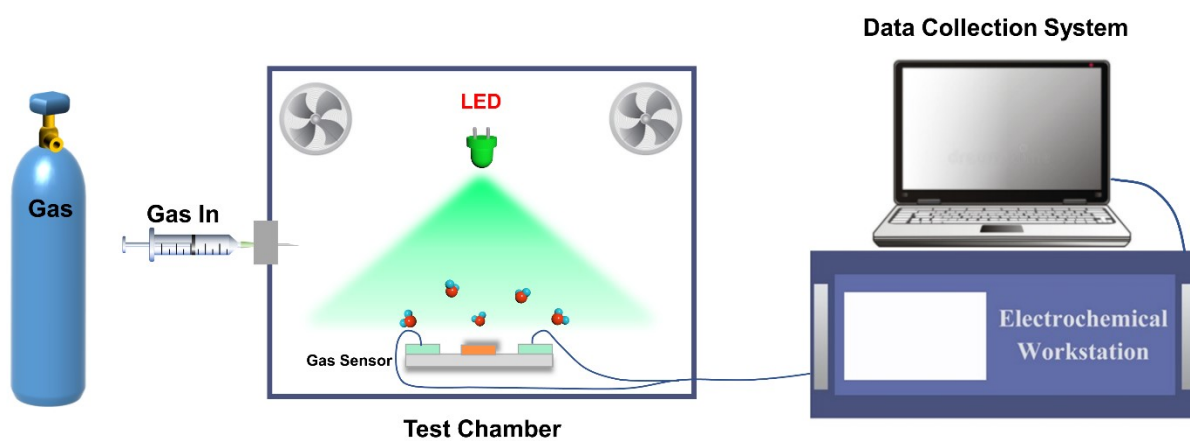

**Fig. S3** Schematic diagram of the sensor measurement.

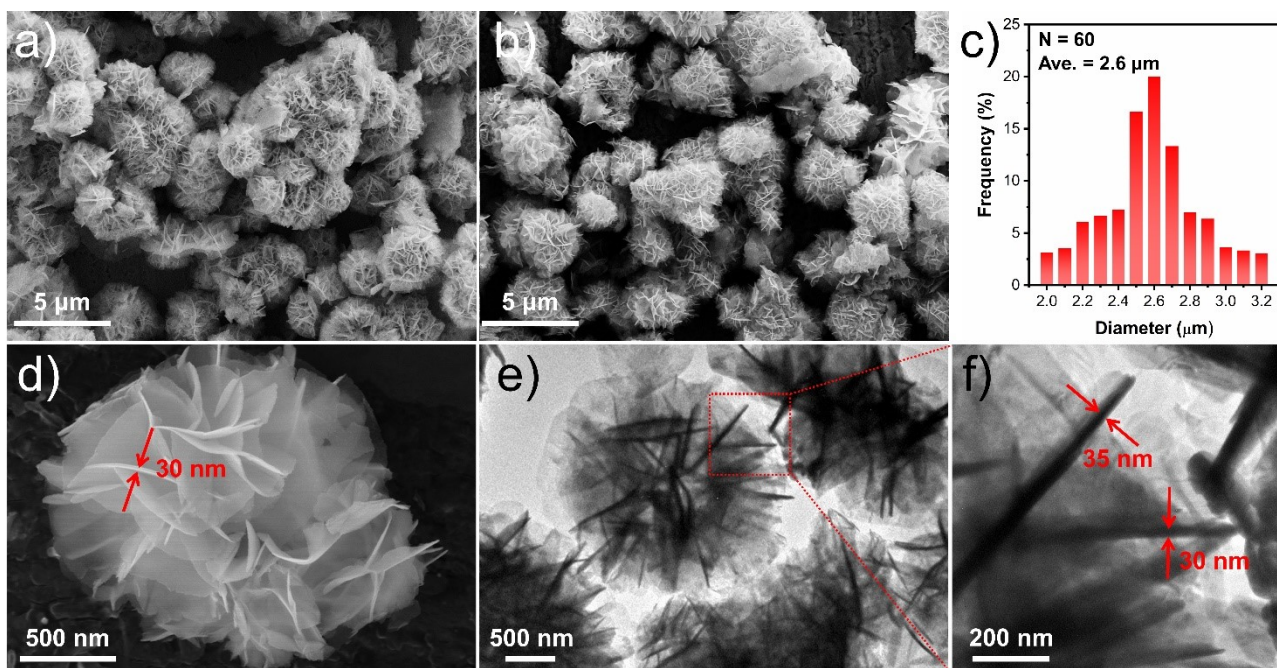

**Fig. S4** (a, b, d) SEM and (e, f) TEM image of pure SnS<sub>2</sub>; (c) The diameter distribution of the hierarchical SnS<sub>2</sub>.

The size of hierarchical SnS<sub>2</sub> is in the range of 2.0-3.2 μm, and the diameter of the majority of nanoflowers are between 2.5 and 2.7 μm, with an average diameter of 2.6 μm. The thickness of constituting nanosheets is about 30-35 nm.

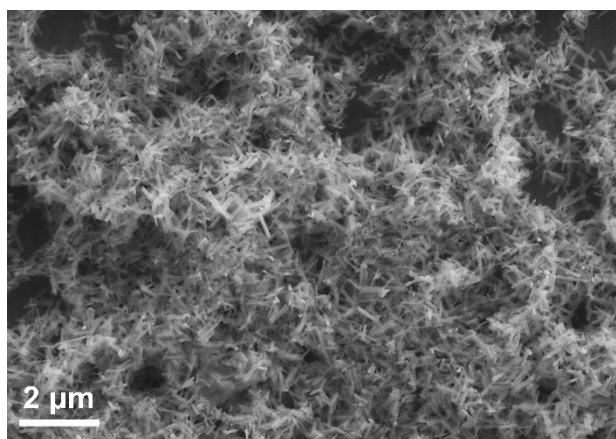

**Fig. S5** SEM image of pure Bi<sub>2</sub>S<sub>3</sub>.

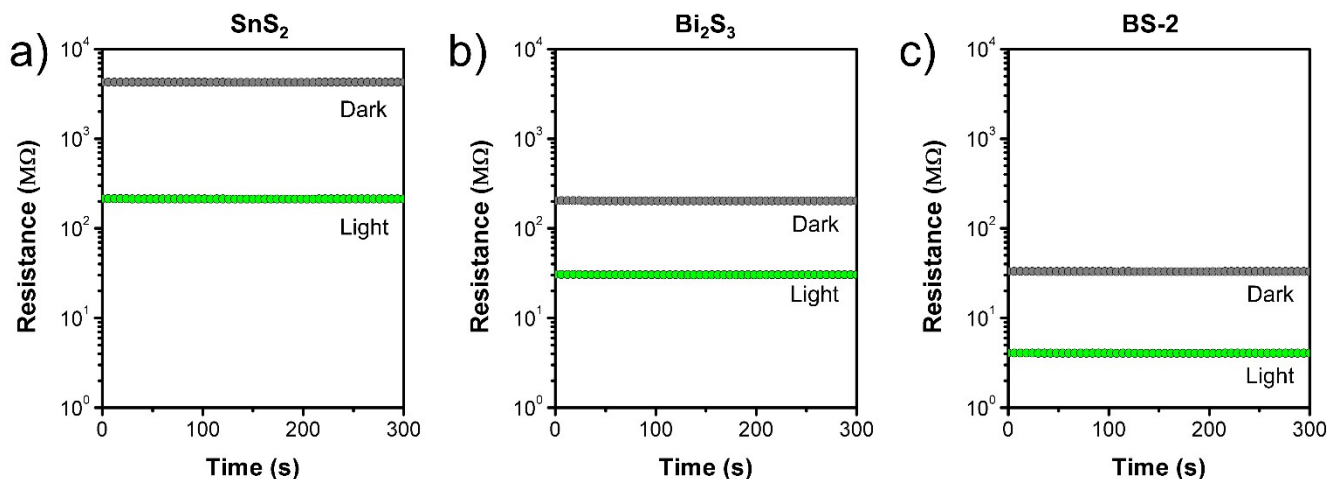

**Fig. S6** The baseline curves of devices based on (a) SnS<sub>2</sub>, (b) Bi<sub>2</sub>S<sub>3</sub>, and (c) BS-2 before and after light irradiation.

**Table S1** Response value and response/recovery time of SnS<sub>2</sub>, Bi<sub>2</sub>S<sub>3</sub>, and BS-2 sensors toward 500 ppb NO<sub>2</sub> and 500 ppb H<sub>2</sub>S in dark and under light illumination, respectively.

| Sensing materials              | 500 ppb NO <sub>2</sub>                    |                                          |                                            |                                          | 500 ppb H <sub>2</sub> S                   |                                          |                                            |                                          |
|--------------------------------|--------------------------------------------|------------------------------------------|--------------------------------------------|------------------------------------------|--------------------------------------------|------------------------------------------|--------------------------------------------|------------------------------------------|
|                                | Dark                                       |                                          | Light                                      |                                          | Dark                                       |                                          | Light                                      |                                          |
|                                | Response (R <sub>g</sub> /R <sub>a</sub> ) | t <sub>res</sub> /t <sub>rec</sub> (s/s) | Response (R <sub>g</sub> /R <sub>a</sub> ) | t <sub>res</sub> /t <sub>rec</sub> (s/s) | Response (R <sub>a</sub> /R <sub>g</sub> ) | t <sub>res</sub> /t <sub>rec</sub> (s/s) | Response (R <sub>a</sub> /R <sub>g</sub> ) | t <sub>res</sub> /t <sub>rec</sub> (s/s) |
| SnS <sub>2</sub>               | —                                          | —                                        | 2.1                                        | 26/150                                   | —                                          | —                                        | —                                          | —                                        |
| Bi <sub>2</sub> S <sub>3</sub> | 2.5                                        | 42/400                                   | 3.0                                        | 35/350                                   | 3.5                                        | 265/300                                  | 1.8                                        | 140/130                                  |
| BS-2                           | 4.0                                        | 55/120                                   | 14.0                                       | 38/80                                    | 12.3                                       | 175/225                                  | 2.1                                        | 130/180                                  |

t<sub>res</sub>/t<sub>rec</sub>: response/recovery time

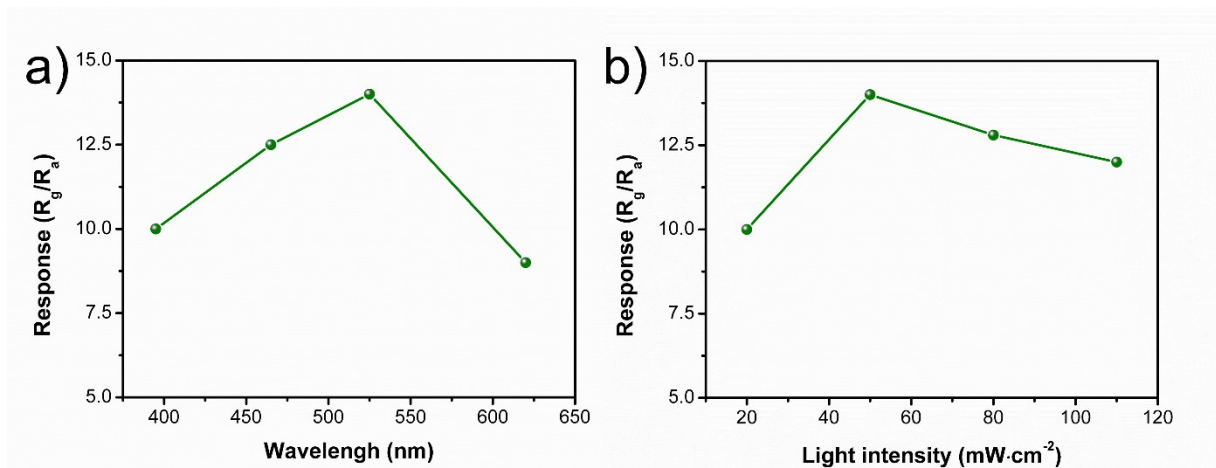

**Fig. S7** Influence of (a) light wavelength and (b) light intensity on the sensing response of BS-2 sensor toward 500 ppb NO<sub>2</sub>.

With the decrease of light wavelength or increase of light intensity, the response first increases and then decreases. One possible reason is that when the light energy is too strong, the number of photogenerated carriers participating during the sensing process will decrease.<sup>1,2</sup> Another possible cause is that the desorption reaction tends to dominate under excessively intensive light irradiation.<sup>3,4</sup> The highest response value is achieved under 525 nm light illumination with the optimal intensity of 50  $mW/cm^2$ .

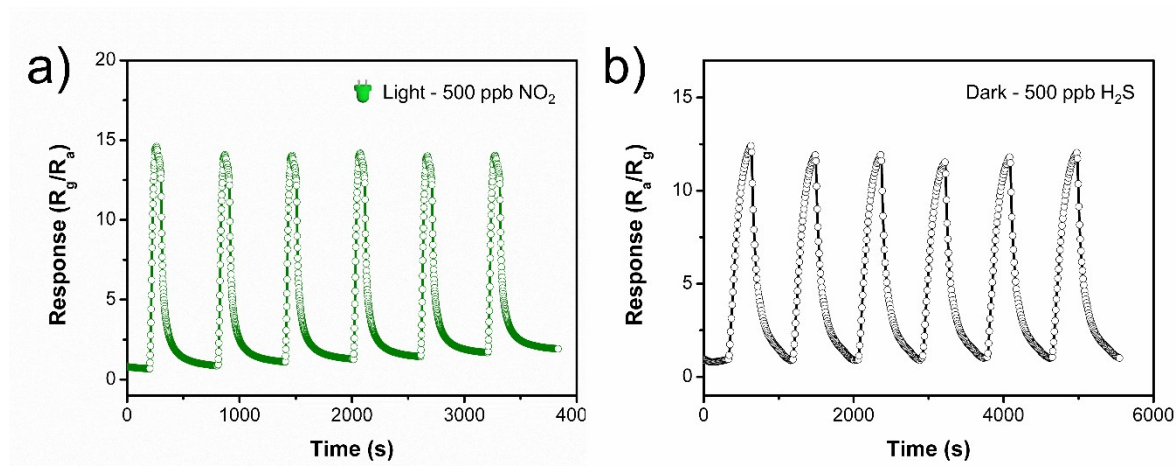

**Fig. S8** Repeatability measurement of BS-2 sensor: six successive sensing cycles to (a) 500 ppb NO<sub>2</sub> under light and (b) 500 ppb H<sub>2</sub>S in dark.

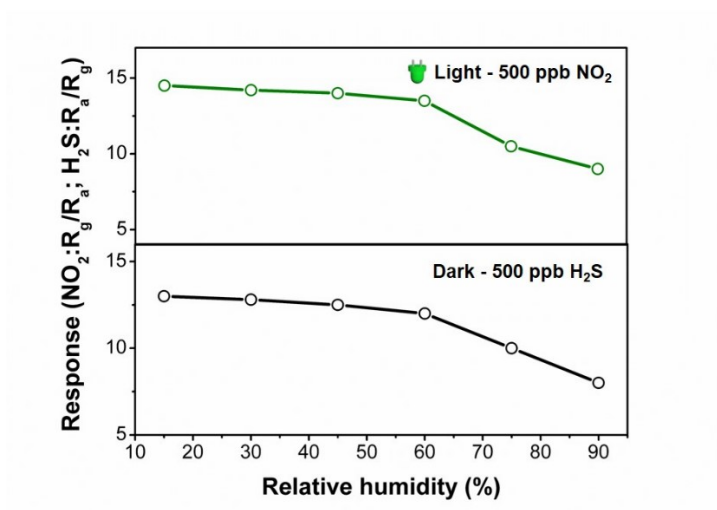

**Fig. S9** Effects of humidity on the sensing responses of the BS-2 towards 500 ppb NO<sub>2</sub> under light and 500 ppb H<sub>2</sub>S in dark.

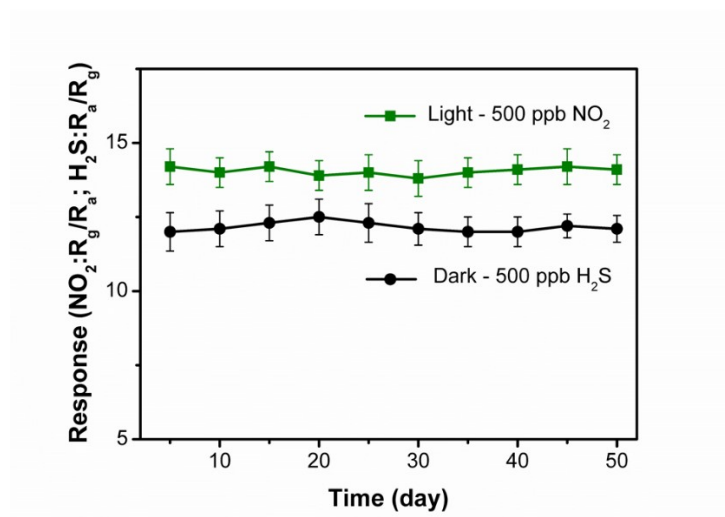

**Fig. S10** Long-term stability of BS-2 sensor within 50 days to 500 ppb NO<sub>2</sub> under light and 500 ppb H<sub>2</sub>S in dark.

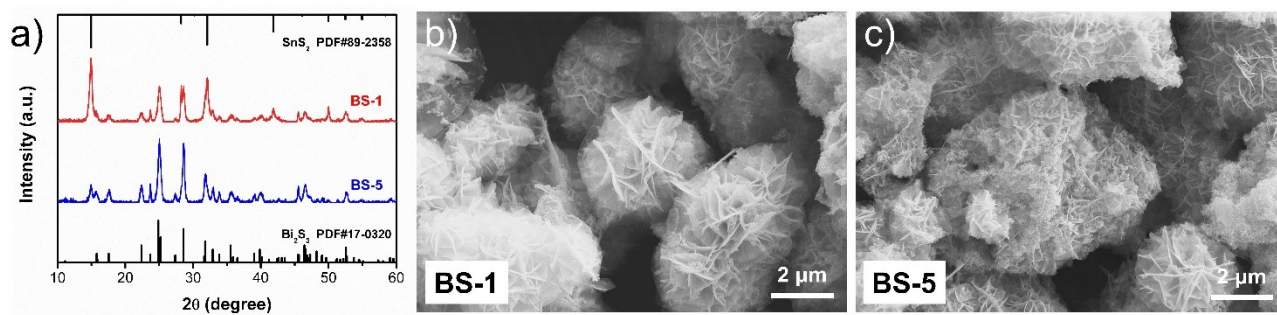

**Fig. S11** (a) XRD patterns and (b-c) SEM images of BS-1 and BS-5 samples.

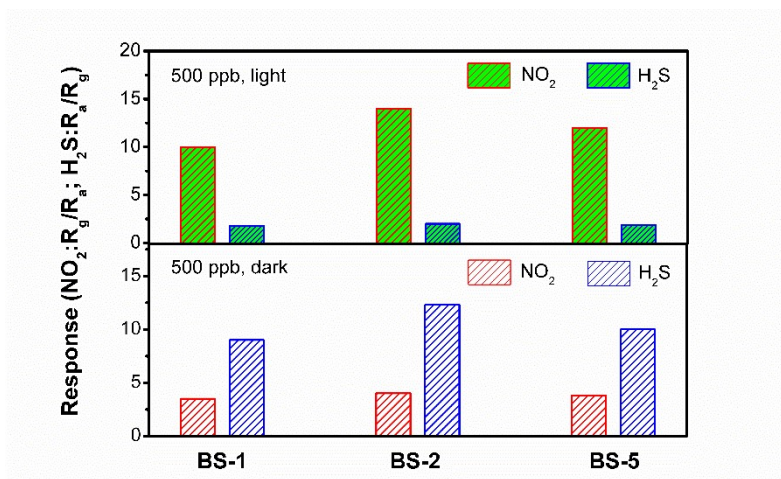

**Fig. S12** The gas sensing responses of BS-1, BS-2, and BS-5 to 500 ppb NO<sub>2</sub> and 500 ppb H<sub>2</sub>S under light and dark, respectively.

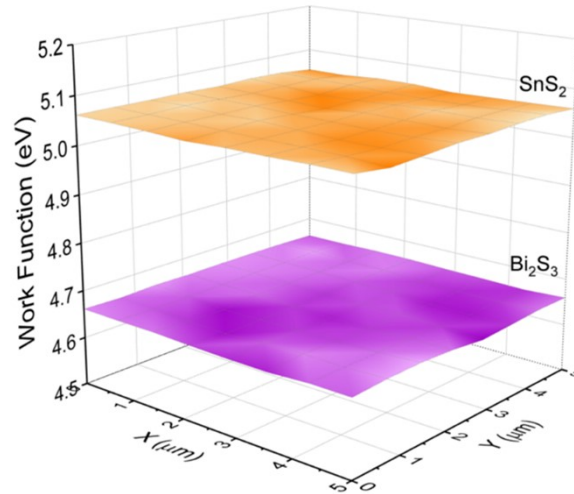

**Fig. S13** Work functions of SnS<sub>2</sub> (5.05 eV) and Bi<sub>2</sub>S<sub>3</sub> (4.65 eV) measured by the Kelvin probe based on 256 data points.

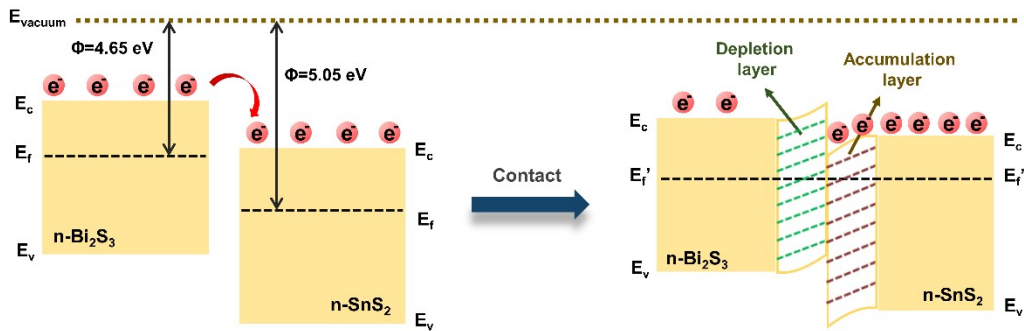

**Fig. S14** Energy band diagram of Bi<sub>2</sub>S<sub>3</sub>/SnS<sub>2</sub> heterostructure before and after equilibrium.



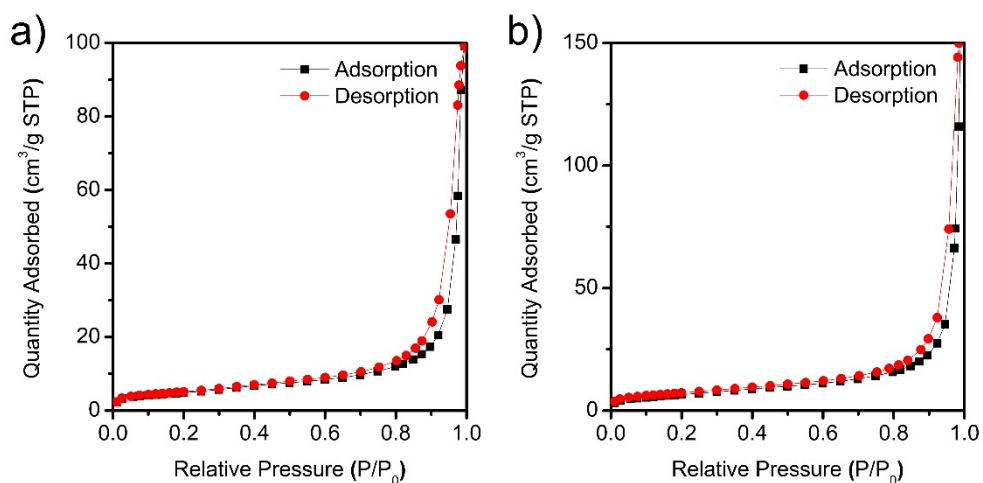

**Fig. S15** Nitrogen adsorption/desorption isotherms of (a) SnS<sub>2</sub> and (b) BS-2 samples.

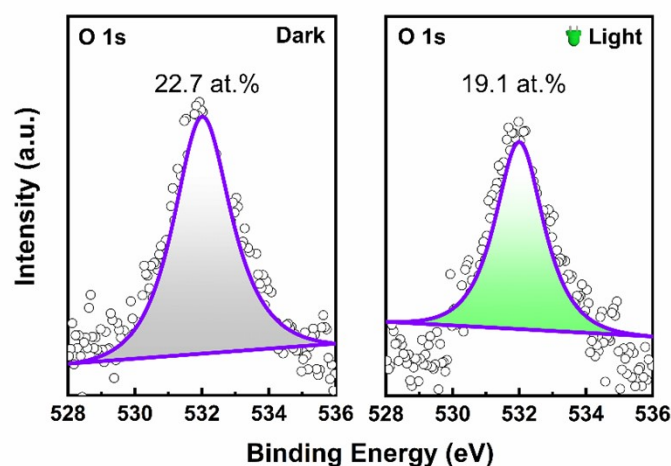

**Fig. S16** The in-situ O 1s XPS spectra of Bi<sub>2</sub>S<sub>3</sub>/SnS<sub>2</sub> heterostructure: (a) in dark and (b) under 525 nm light illumination.

The in-situ X-ray photoelectron spectroscopy analysis was performed by the VG Thermo ESCALAB 250 spectrometer with the 525 nm light assistance. Firstly, the chemical states information of the sample without light illumination was recorded. The circumstances were kept under dark during this entire test. Then, 525nm light was shone on the surface of the sample through the observation window of the spectrometer, simultaneously the surface chemical state of the sample with light irradiation was measured and recorded. In addition to the 525 nm light, there is no other light source during this testing process.

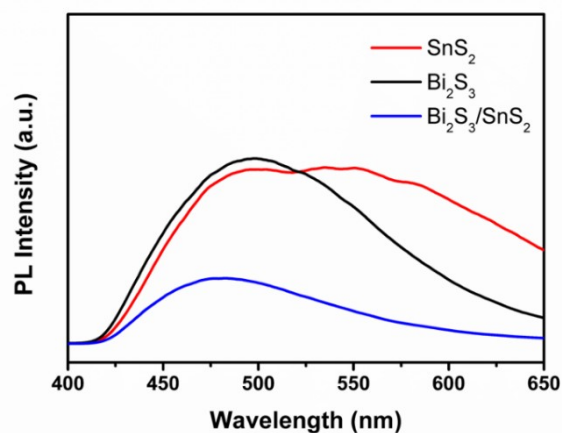

**Fig. S17** PL spectra of SnS<sub>2</sub>, Bi<sub>2</sub>S<sub>3</sub>, and BS-2 samples.

The recombination rate of the photo-generated electron-hole pairs is an important factor affecting the light-assisted sensing properties. The PL spectra of the samples were measured to investigate the charge separation capability. As shown, the Bi<sub>2</sub>S<sub>3</sub>/SnS<sub>2</sub> heterostructure displays a much lower emission peak than that of pure SnS<sub>2</sub> and Bi<sub>2</sub>S<sub>3</sub>, indicating that the electron-hole recombination is efficiently suppressed by the interfacial charge transfer between Bi<sub>2</sub>S<sub>3</sub> and SnS<sub>2</sub>, thereby prolonging the carrier lifetime and further boosting the light-activated NO<sub>2</sub> sensing performance.

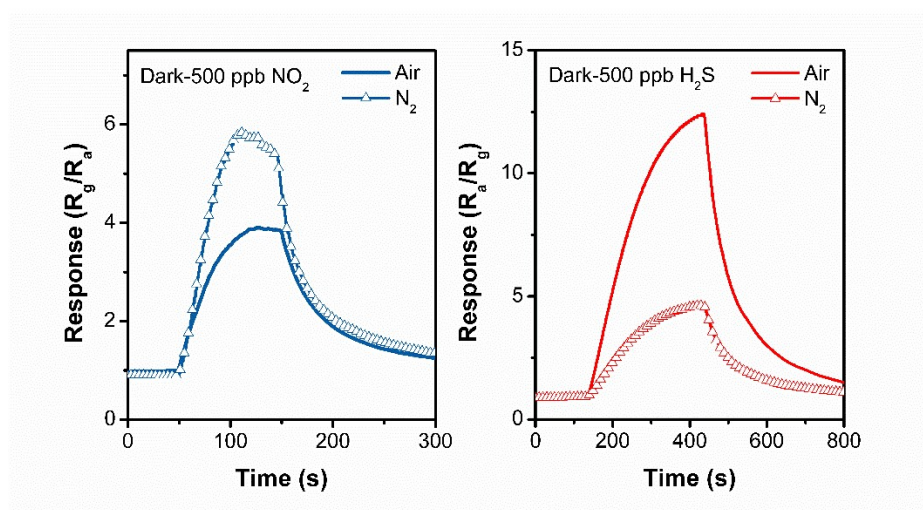

**Fig. S18** The response curves of the BS-2 sensor to 500 ppb (a) NO<sub>2</sub> and (b) H<sub>2</sub>S in nitrogen/air balance under dark.

## References

1. J. M. Suh, T. H. Eom, S. H. Cho, T. Kim and H. W. Jang, *Mater. Adv.*, 2021, **2**, 827-844.
2. Y. Huang, W. Jiao, Z. Chu, X. Nie, R. Wang and X. He, *ACS Appl. Mater. Interfaces*, 2020, **12**, 25178-25188.
3. W. Li, J. Guo, L. Cai, W. Qi, Y. Sun, J.-L. Xu, M. Sun, H. Zhu, L. Xiang, D. Xie and T. Ren, *Sens. Actuators, B*, 2019, **290**, 443-452.
4. S. Zhang, L. Zhao, B. Huang and X. Li, *Sens. Actuators, B*, 2020, **319**, 128264.
